# Supplementary material
Source: PubMed Central journal article supplement (PMC6452902)
Supplement: NIHMS1524922-supplement-10549_2018_5104_MOESM1_ESM.pdf [file NIHMS1524922-supplement-10549_2018_5104_MOESM1_ESM.pdf]

Table S1

| Study intervention                                               | Phase | Study design                | Status     | Estimated completion date | Estimated enrollments | Patients setting                                                                                      | Primary outcomes | ClinicalTrials.gov identifier |
|------------------------------------------------------------------|-------|-----------------------------|------------|---------------------------|-----------------------|-------------------------------------------------------------------------------------------------------|------------------|-------------------------------|
| MLN0128 in combination with FUL                                  | II    | Randomized open-labeled     | Recruiting | May-2018                  | 153                   | Postmenopausal women with ER+/HER2- ABC or MBC resistant to AI                                        | PFS              | NCT02756364                   |
| MLN0128 in combination with EXE or FUL                           | I/II  | Non-randomized open-labeled | Recruiting | Dec-2018                  | 128                   | Postmenopausal women with ER+/HER2- ABC or MBC resistant to Everolimus in combination with EXE or FLU | AE, CBR          | NCT02049957                   |
| TAK-228 and Tamoxifen                                            | II    | Single arm open-labeled     | Recruiting | Aug-2019                  | 28                    | Women with ER+/HER2- breast cancer                                                                    | Ki67 score       | NCT02988986                   |
| TAK-228 and TAK-117 followed by cisplatin and nab-Paclitaxel     | II    | Single arm open-labeled     | Recruiting | Jun-2022                  | 20                    | Women with TNBC resistant to AC-T chemotherapy                                                        | RR               | NCT03193853                   |
| MLN0128 and MLN8237                                              | I     | Non-randomized open-labeled | Recruiting | Nov-2018                  | 56                    | Advanced solid tumor or metastatic TNBC received first-line treatment                                 | MTD              | NCT02719691                   |
| TAK-228 followed by Letrozole and TAK-228 as neoadjuvant therapy | I     | Single arm open-labeled     | Recruiting | Dec-2019                  | 13                    | Postmenopausal women with ER+ breast cancer without metastasis                                        | TRAE             | NCT02619669                   |
| TAK-228 with carboplatin and paclitaxel                          | I     | Single arm open-labeled     | Recruiting | Mar-2024                  | 50                    | Patients with solid tumor relapsed after standard therapy                                             | MTD              | NCT03430882                   |

**Abbreviations:** ABC, advanced breast cancer; AE, adverse side effect; CBR, clinical benefit rate; ER, estrogen receptor; EXE, excemestane; FUL, fulvestrant; HER2, human epidermal growth factor receptor 2; LET, letrozole; MBC, metastatic breast cancer; MTD, maximam tolerated dose; PFS, progression free survival; RR, response rate; TNBC, triple negative breast cancer; TRAE, treatment related adverse event
