# Supplementary material
Source: PubMed Central journal article supplement (PMC6452902)
Supplement: NIHMS1524922-supplement-10549_2018_5104_MOESM2_ESM.pdf [file NIHMS1524922-supplement-10549_2018_5104_MOESM2_ESM.pdf]

## **Supplementary material and methods**

### **Drugs**

Palbociclib were purchased from Selleckchem for *in vitro* and LC Laboratories for *in vivo* analyses, respectively. MLN0128 were purchased from LC Laboratories. For *in vitro* experiments, they were dissolved in dimethyl sulfoxide (DMSO). For *in vivo* studies, a palbociclib stock solution was prepared with phosphate-buffered saline (PBS). MLN0128 was dissolved using 5% N-methyl-2-pyrrolidone, 15% polyvinyl pyrrolidone in water (MLN0128 vehicle).

### **Cell proliferation assay and combination index analysis**

To quantify the effects of drugs on cell proliferation, we initially performed the 3-(4,5-dimethylthiazol-2-yl)-2,5-diphenyltetrazolium bromide (MTT) assay (Sigma-Aldrich). MB231, MB453, MB468, and CAL148 were seeded into 96-well plates at densities of 2000 – 5000 cells per well in 100 µl of DMEM. After 24 h incubation at 37 °C, cells were treated with palbociclib, and/or MLN0128. DMSO was used as a vehicle control. After replacing media with the drugs, cells were cultured up to 120 h. After 24, 72 and 120 h, MTT reagent was added to each well at a concentration of 1 mg/ml in phenol red free DMEM and incubated for 1 h at 37 °C. After incubation, the reagent was removed, and then 100 µl of DMSO was added to each well. The absorbance at 570 nm was measured using a 96-well plate reader. A combination index analysis was performed using CalcuSyn software, version 2 (Biosoft) and the Chou-Talalay method (Cancer Res, 2010).

## **Colony formation assay**

This assay was performed to confirm the growth suppression effects of the drugs. Cells were seeded in 6-well plates at a level of 1000 cells for MB231 or 2000 cells for MB453 per well in 2 ml DMEM. After attachment of cells to the plates, the drug-free media was changed to media containing one of the following: control (vehicle), palbociclib, MLN0128, or palbociclib + MLN0128. The culture media were replaced every 3 days with DMEM containing fresh drugs. Cells were incubated for 7 days in MB231 or for 21 days in MB453. Cells were then washed twice with PBS and incubated with 0.5% crystal violet (Sigma-Aldrich) in methanol at room temperature (RT) for 30 minutes. Colony numbers were counted manually.

## **Cell cycle analysis**

The growth suppression effects of the two drugs were also evaluated through cell cycle analysis. Single cells were collected from cell culture and fixed with 70% ethanol at -20 °C. After fixation, single-cell suspensions were incubated with 20 µg/ml of RNaseA (Thermo Fisher Scientific) in PBS at RT for 30 minutes and then stained with 100 µg/ml of propidium iodide (Life Technology) at 4 °C overnight. Flow cytometric analysis was conducted using a CyAn ADP cytometer (Dako) and analyzed with FlowJo software (TreeStar). These analyses were performed by the Analytical Cytometry Core facility at City of Hope

## **Western blot analysis**

Cells were seeded into 60 mm petri dishes and incubated at 37 °C for 24 h. After incubation, cells were treated with palbociclib and/or MLN0128 for 48 h. Cells were lysed using lysis buffer [0.15 M NaCl, 0.5% sodium deoxycholate, 0.1% Nonident P40, 50 mM Tris-HCl pH 7.5, cOmplete™ protease inhibitor cocktail (Roche), and Halt™ phosphatase inhibitor cocktail (Thermo Fisher Scientific)], then mixed with loading sample buffer (50 mM Tris-HCl pH 8.8, 10% glycerol, 2% SDS, 0.01% bromophenol blue, 10% 2-mercaptoethanol), and heated at 100 °C for 5 minutes. The lysates were loaded into polyacrylamide gels, subjected to electrophoresis at 150 V for 60 minutes, and transferred to a polyvinylidene difluoride membrane by wet transfer at 300 mA for 60 minutes. The membranes were blocked in blocking buffer (5% non-fat milk in TBST) at RT for 60 minutes and incubated with appropriate primary antibody in 5% non-fat milk or bovine serum albumin in TBST at 4 °C overnight. Then the membranes were incubated with the appropriate secondary antibody in blocking buffer at RT for 60 minutes. The signal was detected with Clarity™ Western ECL Blotting Substrate (Bio-Rad) using a ChemiDoc™MP imaging system (Bio-Rad).

### **Quantitative PCR analysis**

Each cDNA was synthesized from 1 µg of RNA. Real-time reverse transcription-PCR was carried out using CFX Connect™ Real-Time System (Bio-Rad). cDNA samples prepared from MB231 and MB453 were mixed in 20 µl reactions containing SYBR Green FastMix (Quantabio) and each primer: ACTB 5'-GCCCTGGACTTCGAGCAAGA-3' (forward) and 5'-ACGGAGTACTTGCGCTCAGG-3' (reverse), and CCNE1 5'-ACACCATGAAGGAGGACGGC-3' (forward) and 5'-TCAGGTGTGGGGATCAGGGA-3'

(reverse). The expression levels of CCNE1 were determined relative to the expression level of ACTB.

### **Antibodies**

For Western blotting, anti-pRb (#9309), anti-phospho-pRb (Ser807/811) (#9308), anti-mTOR (#2972), anti-phospho-mTOR (Ser2448) (#2971), anti-p70 S6 kinase (#9202), anti-phospho-p70 S6 kinase (Thr389) (#9234), anti-phospho-S6 (Ser235/236) (#4858), anti-cyclin E1 (#4129), and anti-cyclin E2 (#4132) antibodies were purchased from Cell Signaling Technology, and anti-cyclin D1 (sc-20044) and anti- $\beta$ -actin (sc-47778) antibodies were purchased from Santa Cruz Biotechnology. All antibodies were used at 1:1000 dilutions. For IHC, anti-Ki67 (M7240) was purchased from Dako.

### **Statistical analysis**

Unless otherwise described, *in vitro* data are presented as mean  $\pm$  SD. *In vivo* animal data are presented as mean  $\pm$  SEM. Significant differences ( $p < 0.05$ ) between the 4 groups were determined by one-way ANOVA with Tukey's multiple comparison post-hoc test.
